# Supplementary material
Source: ML conference proceedings conference paper supplement (https://openreview.net/forum?id=NPAgarrM73)
Supplement: supplementary_material [file attachment]

## 1 **A Appendix / supplemental material**

### 2 **A.1 Dataset description**

3 The KidSat dataset we present in this work includes both cluster-wise child poverty derived from the  
4 DHS data and the satellite imagery corresponding to each cluster. Due to the confidentiality of the  
5 survey data, DHS requires registration prior to accessing the data. We include detailed procedures  
6 for acquiring the satellite imagery and DHS data in our GitHub repository. For the review process,  
7 we provide the data and pre-trained models: [https://drive.google.com/drive/folders/  
8 1W9-bFdf5FEGG8J3U6Z9KcZ8I2iSG4lGm?usp=sharing](https://drive.google.com/drive/folders/1W9-bFdf5FEGG8J3U6Z9KcZ8I2iSG4lGm?usp=sharing). The access will be removed after the  
9 review.

#### 10 **A.1.1 Coding child poverty**

11 The `severe_deprivation` variable is used in this work to represent severe child poverty for  
12 individual responses within the cluster. It is calculated by aggregating several indicators of severe  
13 deprivation across multiple dimensions such as housing, water, sanitation, nutrition, health, and  
14 education. A child is considered severely deprived if they experience at least one severe deprivation  
15 in any of the following areas:

- 16 1. Housing: Severe deprivation if the number of persons per room is 5 or more.
- 17 2. Water: Severe deprivation if the household uses unsafe water sources.
- 18 3. Sanitation: Severe deprivation if the household lacks access to safe sanitation facilities.
- 19 4. Nutrition: Severe deprivation if a child’s height-for-age z-score is below -3 (indicating  
20 severe stunting).
- 21 5. Health: Severe deprivation if a child misses all essential vaccines or has untreated acute  
22 respiratory infections.
- 23 6. Education: Severe deprivation if a school-aged child does not attend school and has not  
24 completed any level of education.

25 Among all DHS variables involved in child poverty calculation, we selected 17 variables, presented  
26 in Table 1, as the prediction objective during model fine-tuning. We scaled the continuous variables  
27 to the range from 0 to 1. We expanded the categorical columns using one-hot encoding, where each  
28 column is in the format of `variable_value`. In total, a vector of dimension 99 based on these 17  
29 DHS variables was used to represent a cluster, where we mapped the satellite imagery to predict these  
30 vectors as the method of model fine-tuning.

### 31 **A.2 Compute**

32 As one of the heavy-lifting parts is loading images, a multi-core CPU ( $\geq 8$ ) is recommended to  
33 optimise the data loading using multiple workers with the data loader. The training was done using  
34 Nvidia Tesla V100 GPUs for DINO v2 experiments and Nvidia L4 GPUs for SatMAE experiments.  
35 In particular, for DINO v2 experiments with Sentinel imagery, 32 GB of GPU memory is a hard  
36 requirement.

### 37 **A.3 Experimental details**

38 The dataset for our experiments was sourced from Sentinel-2 and Landsat-8 satellite imagery. Each  
39 image tile, corresponding to specific geographical centroids, was preprocessed by selecting and  
40 stacking RGB bands, normalising, and clipping pixel values to the 0-255 range. Data was organised  
41 into cross-validation folds with separate training and testing sets. Only centroids with available  
42 imagery were included, and rows with missing target values were excluded to maintain data integrity.  
43 As a MOSAIK

#### 44 **A.3.1 DINOv2**

45 We used the base DINOv2 Vision Transformer (ViT) model which has an output of 768-dimension  
46 feature vector. We appended a regression head for mapping the feature vector to the 99-dimension

Table 1: DHS variables selected for model fine-tuning

| Variable | Description                                                                                                                               | Type        |
|----------|-------------------------------------------------------------------------------------------------------------------------------------------|-------------|
| h10      | Whether the child ever received any vaccination to prevent diseases.                                                                      | Categorical |
| h3       | DPT 1 vaccination.                                                                                                                        | Categorical |
| h31      | Whether the child had suffered from a cough in the last two weeks and whether the child had been ill with the cough in the last 24 hours. | Categorical |
| h5       | DPT 2 vaccination.                                                                                                                        | Categorical |
| h7       | DPT 3 vaccination.                                                                                                                        | Categorical |
| h9       | Measles 1 vaccination.                                                                                                                    | Categorical |
| hc70     | Height for age standard deviation (according to WHO).                                                                                     | Continuous  |
| hv106    | Highest level of education the household member attended.                                                                                 | Categorical |
| hv109    | Educational attainment recoded.                                                                                                           | Categorical |
| hv121    | Household member attended school during current school year.                                                                              | Categorical |
| hv201    | Main source of drinking water for members of the household.                                                                               | Categorical |
| hv204    | Time taken to get to the water source for drinking water                                                                                  | Continuous  |
| hv205    | Type of toilet facility in the household.                                                                                                 | Categorical |
| hv216    | Number of rooms used for sleeping in the household.                                                                                       | Continuous  |
| hv225    | Whether the household shares a toilet with other households.                                                                              | Categorical |
| hv271    | Wealth index factor score (5 decimals)                                                                                                    | Continuous  |
| v312     | Current contraceptive method.                                                                                                             | Categorical |

47 target DHS variables. The Adam optimiser was used, with a learning rate and weight decay of  $1e-6$   
 48 for both the base model and the regression head. Training involved iterating over 20 epochs for  
 49 Landsat imagery and 10 epochs for Sentinel imagery to minimise the L1 loss between predicted and  
 50 actual target values. The batch size was determined by available GPU memory, 8 for Landsat imagery  
 51 source and 1 for Sentinel. The average training time is 1 hour per epoch for Landsat experiments and  
 52 2 hours per epoch for Sentinel experiments.

### 53 A.3.2 SatMAE

54 The base SatMAE model is the decoder of a MAE, outputting a 1024-dimensional vector. Fine-tuning  
 55 is done by appending a transformer head mapping to the 99-dimensional target DHS variables. We  
 56 use the Adam optimiser, with a learning rate of  $1e-5$  and weight decay of  $1e-6$  for both the base model  
 57 and the head. Training involved iterating over 20 epochs for both Landsat imagery and Sentinel  
 58 imagery to minimise the L1 loss between predicted and actual target values, with early stopping of  
 59 patience 5 and delta  $5e-4$ . The batch size is 32 for spatial task and 16 for temporal task. Training  
 60 takes 1 hour for the first epoch and 15-30 minutes for each subsequent one when data caching is used.
